# Supplementary material
Source: MDPI journal article supplement (https://www.mdpi.com/2073-4441/12/4/1023)
Supplement: s1 [file s1]

Archive with 2 entries (2 files):
- videoabstract-TreeBasedNitrate(1).mp4
- water-752594-supplementary.pdf
