# Supplementary material
Source: MDPI journal article supplement (https://www.mdpi.com/2073-4441/12/4/1023)
Supplement: s1 [file s1 › water-752594-supplementary.pdf]

# Tree based Modeling Methods to Predict Nitrate Exceedances in the Ogallala Aquifer in Texas

Venkatesh Uddameri<sup>a\*</sup>, Ana Luiza Bessa Silva<sup>a</sup>, Sreeram Singaraju<sup>a</sup>, Ghazal Mohammadi<sup>a</sup> and E. Annette Hernandez<sup>a</sup>

<sup>a</sup>Department of Civil, Environmental and Construction Engineering  
Texas Tech University, Lubbock, TX 79409-1023

\*Corresponding author: Venki.uddameri@ttu.edu

## Supplementary Information

**Table 1.** Contingency Tables for Training and Testing Data for Various Models along with Cut-off Probabilities.

|                         |   | Training |         | Testing  |    |
|-------------------------|---|----------|---------|----------|----|
|                         |   | Observed |         | Observed |    |
| Cut-off:0.516           |   | 1        | 0       | 1        | 0  |
| LR                      | 1 | 35 (TP)  | 6 (FP)  | 10       | 6  |
|                         | 0 | 8 (FN)   | 26 (TN) | 5        | 5  |
| Cut-off:0.040           |   |          |         |          |    |
| CART                    | 1 | 42       | 1       | 11       | 4  |
|                         | 0 | 1        | 31      | 4        | 7  |
| Cut-off:0.475           |   |          |         |          |    |
| MARS                    | 1 | 41       | 2       | 10       | 3  |
|                         | 0 | 2        | 30      | 5        | 8  |
| Cut-off:0.667           |   |          |         |          |    |
| Random Forest           | 1 | 28       | 7       | 10       | 1  |
|                         | 0 | 15       | 25      | 5        | 10 |
| Cut-off:0.576           |   |          |         |          |    |
| Gradient Boosting Trees | 1 | 36       | 3       | 10       | 3  |
|                         | 0 | 7        | 29      | 5        | 8  |
